# Supplementary material for: Tailored lymph node dissection in right hemicolectomy: a retrospective study focusing on the anterior tissue of the superior mesenteric vein surgical trunk
Source: PeerJ journal article supplement (doi:10.7717/peerj.19290), 2025-04-18
Supplement: Graphic_abstract.pdf [file Graphic_abstract.pdf]

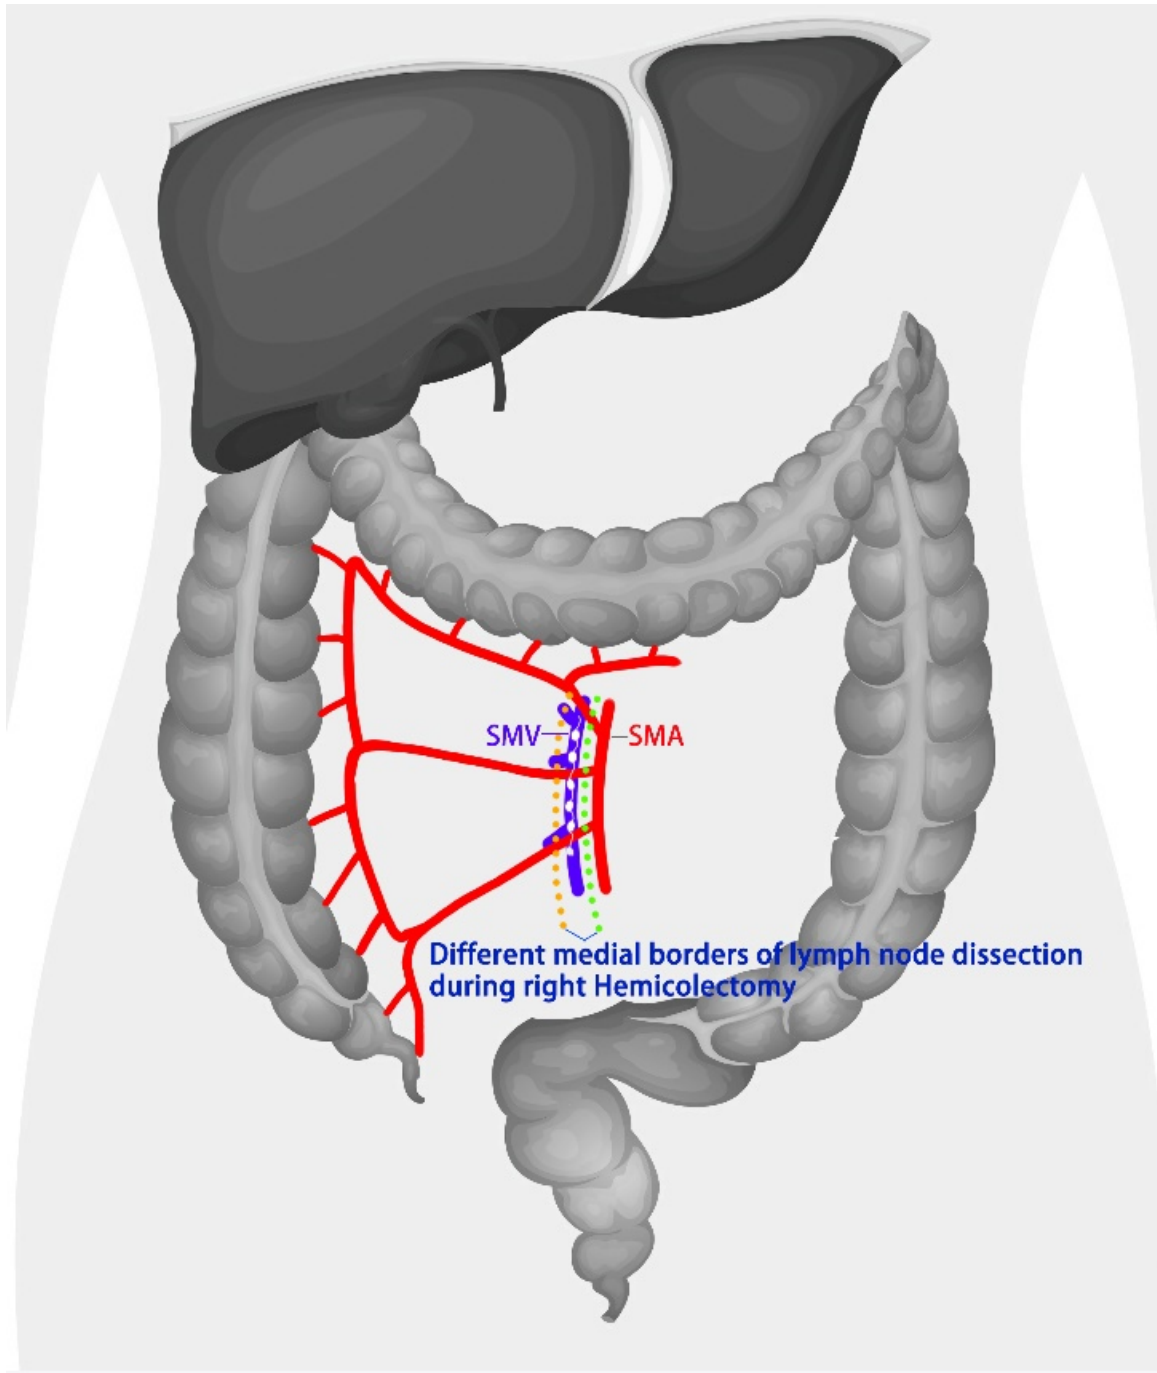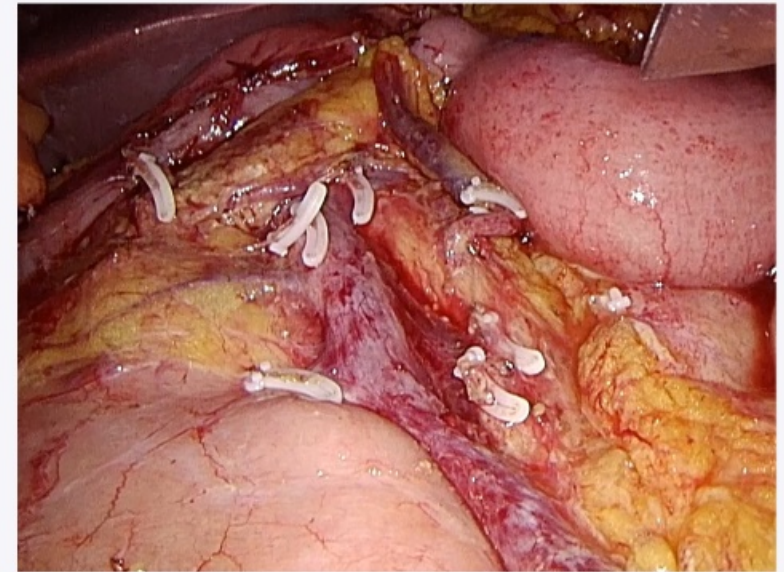

SMV-left

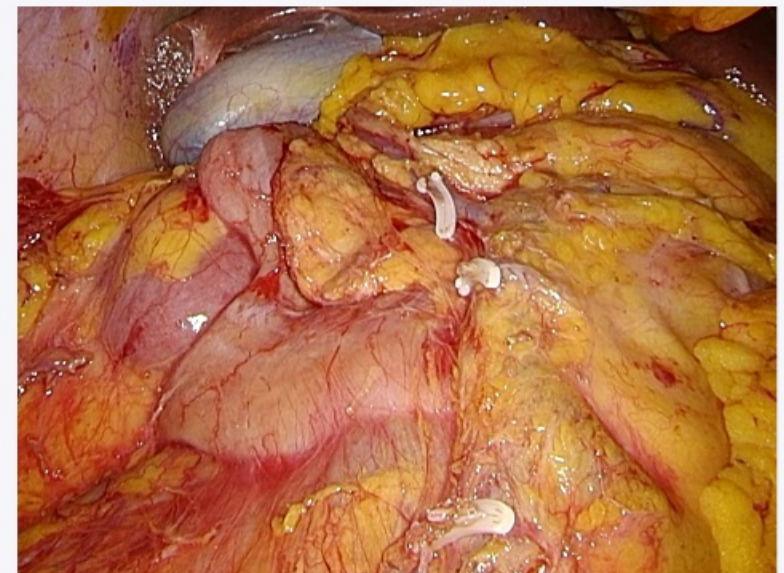

SMV-right
