# Supplementary material for: Tailored lymph node dissection in right hemicolectomy: a retrospective study focusing on the anterior tissue of the superior mesenteric vein surgical trunk
Source: PeerJ. 2025 Apr 18;13:e19290. doi: 10.7717/peerj.19290 (PMC12011013; doi:10.7717/peerj.19290)
Supplement: Supplemental Information 1 [file peerj-13-19290-s001.xlsx]

## Sheet: Sheet1
ID	Age	Sex	Height	Weight	BMI	ASA	Tumor location	Tumor location(root of ICV)	Preoperative CEA levels(ng/ml)	Preoperative CA19-9 levels(ng/ml)	Operation approach	Operation duration (min)	Blood loss (ml)	Post-operative complications	Pathologic TNM_stage	No. of paracolic lymph nodes	No. of positive paracolic lymph nodes	No. of intermediate lymph nodes	No. of positive intermediate lymph nodes	No. of main lymph nodes	No. of positive main lymph nodes	Total no. of lymph nodes	Total no. of postive lymph nodes	skip metastases	No. of lymph nodes of the anterior tissue of the SMV surgical trunk	No. of positive lymph nodes of the anterior tissue of the SMV surgical trunk	length of the anterior tissue of the SMV surgical trunk	Preoperative bowel obstruction	Postoperative defecation time (day)	Postoperative hospital stay length (day)	No. of nerve fibers of the anterior tissue of the SMV surgical trunk	Postoperative diarrhea	Post-operative drainage volume(ml)	Days to drain removal(day)	drainage volume per day(ml)	lymph node dissection approach
1	74	1	168	42	14.881	2	Ascending colon	Below ICV	≤5	≤35	Laparoscopy	281	100	None	T2N0M0	3	0	6	0	2	0	11	0	no	NA	NA	NA	No	7	14	NA	0	1090	9	121.111	SMV-right
2	69	0	155	57	23.7253	2	Ascending colon	Above ICV	＞5	＞35	Laparoscopy	167	50	None	T4N1M0	5	1	6	1	2	0	13	2	no	NA	NA	NA	No	1	8	NA	0	170	2	85	SMV-right
3	67	1	168	59.5	21.0813	2	Ascending colon	Above ICV	≤5	≤35	Laparoscopy	221	50	None	T2N0M0	17	0	16	0	8	0	41	0	no	NA	NA	NA	No	1	10	NA	1	200	2	100	SMV-right
4	64	0	163	58	21.83	1	Ascending colon	Below ICV	＞5	≤35	Laparoscopy	190	20	None	T4N0M0	12	0	6	0	12	0	30	0	no	NA	NA	NA	No	5	11	NA	0	270	3	90	SMV-right
5	75	1	179	68	21.2228	2	Hepatic flexure	Above ICV	＞5	≤35	Laparoscopy	202	50	None	T4N0M0	9	0	10	0	17	0	36	0	no	NA	NA	NA	No	8	12	NA	0	300	2	150	SMV-right
6	68	1	153	63	26.9127	3	Cecum	Below ICV	≤5	＞35	Laparoscopy	235	100	None	T4N2M0	9	3	4	0	7	3	20	6	yes	NA	NA	NA	No	3	8	NA	0	90	2	45	SMV-right
7	71	0	155	36	14.9844	2	Cecum	Below ICV	≤5	≤35	Laparoscopy	200	50	None	T2N0M0	9	0	6	0	4	0	19	0	no	NA	NA	NA	No	3	5	NA	1	0	0	0	SMV-right
8	80	0	159	67	26.5021	3	Ascending colon	Above ICV	＞5	＞35	Laparoscopy	175	50	None	T4N0M0	7	0	6	0	5	0	18	0	no	NA	NA	NA	No	3	9	NA	0	100	1	100	SMV-right
9	66	1	164	60	22.3081	2	Ascending colon	Below ICV	≤5	≤35	Laparoscopy	230	50	None	T4N0M0	7	0	6	0	4	0	17	0	no	NA	NA	NA	No	2	9	NA	0	210	2	105	SMV-right
10	60	1	170	55	19.0311	2	Cecum	Below ICV	≤5	≤35	Laparoscopy	280	20	None	T4N1M0	10	1	6	0	13	0	29	1	no	NA	NA	NA	No	2	7	NA	0	170	2	85	SMV-right
11	75	1	170	80	27.6817	2	Ascending colon	Above ICV	＞5	≤35	Laparoscopy	195	50	None	T4N0M0	4	0	1	0	9	0	14	0	no	NA	NA	NA	Yes	3	14	NA	1	150	2	75	SMV-right
12	70	1	164	58	21.5645	3	Cecum	Below ICV	＞5	＞35	Laparoscopy	231	50	None	T4N0M0	14	0	3	0	10	0	27	0	no	NA	NA	NA	No	3	10	NA	0	60	2	30	SMV-right
13	81	0	152	54	23.3726	4	Cecum	Below ICV	≤5	≤35	Laparoscopy	305	50	Chylous fistula	T2N0M0	12	0	9	0	15	0	36	0	no	NA	NA	NA	No	4	17	NA	0	315	4	78.75	SMV-right
14	37	1	169	55	19.257	1	Ascending colon	Below ICV	≤5	≤35	Laparoscopy	240	150	None	T4N0M0	21	0	8	0	27	0	56	0	no	NA	NA	NA	No	2	9	NA	0	520	6	86.6667	SMV-right
15	69	0	159	70	27.6888	2	Hepatic flexure	Above ICV	≤5	≤35	Laparoscopy	195	100	None	T2N0M0	0	0	4	0	8	0	12	0	no	NA	NA	NA	No	3	17	NA	0	340	3	113.333	SMV-right
16	46	1	170	80	27.6817	2	Transverse colon	Above ICV	＞5	≤35	Open	225	100	None	T4N2M0	11	4	3	0	7	0	21	4	no	NA	NA	NA	No	5	9	NA	0	130	3	43.3333	SMV-right
17	80	1	168	60	21.2585	3	Ascending colon	Below ICV	＞5	≤35	Laparoscopy	150	50	None	T4N1M0	7	2	5	0	7	0	19	2	no	NA	NA	NA	No	4	11	NA	1	310	4	77.5	SMV-right
18	73	1	181	65	19.8407	1	Transverse colon	Above ICV	≤5	≤35	Laparoscopy	187	50	None	T4N0M0	8	0	16	0	14	0	38	0	no	NA	NA	NA	No	4	8	NA	0	1270	5	254	SMV-right
19	66	0	155	62.5	26.0146	2	Ascending colon	Above ICV	＞5	≤35	Laparoscopy	225	50	None	T4N1M0	9	2	12	0	7	0	28	2	no	NA	NA	NA	No	3	8	NA	0	160	2	80	SMV-right
20	70	0	160	59	23.0469	2	Ascending colon	Above ICV	＞5	≤35	Laparoscopy	215	50	None	T4N0M0	11	0	2	0	4	0	17	0	no	NA	NA	NA	No	3	8	NA	0	430	3	143.333	SMV-right
21	80	1	165	66	24.2424	2	Ascending colon	Below ICV	＞5	＞35	Laparoscopy	230	100	None	T4N0M0	12	0	4	0	10	0	26	0	no	NA	NA	NA	No	3	9	NA	0	940	5	188	SMV-right
22	81	1	170	85	29.4118	3	Hepatic flexure	Above ICV	＞5	≤35	Laparoscopy	248	200	None	T4N0M0	11	0	7	0	10	0	28	0	no	NA	NA	NA	No	4	9	NA	0	1620	5	324	SMV-right
23	54	0	147	43	19.8991	2	Ascending colon	Below ICV	＞5	＞35	Laparoscopy	245	50	None	T4N1M0	18	1	8	0	5	0	31	1	no	NA	NA	NA	No	3	8	NA	0	350	3	116.667	SMV-right
24	80	1	162	53	20.1951	2	Ascending colon	Above ICV	＞5	≤35	Open	195	50	Poor wound healing	T4N1M0	6	2	6	1	11	0	23	3	no	NA	NA	NA	Yes	5	32	NA	0	4860	10	486	SMV-right
25	85	0	155	44	18.3143	3	Hepatic flexure	Above ICV	≤5	≤35	Laparoscopy	177	100	None	T2N0M0	11	0	3	0	7	0	21	0	no	NA	NA	NA	No	3	13	NA	0	1000	4	250	SMV-right
26	73	1	174	71	23.4509	4	Ascending colon	Below ICV	＞5	≤35	Laparoscopy	185	100	None	T4N1M0	14	0	6	2	6	1	26	3	no	NA	NA	NA	No	1	8	NA	0	260	2	130	SMV-right
27	64	1	170	61	21.1073	3	Hepatic flexure	Above ICV	≤5	≤35	Laparoscopy	195	100	None	T4N1M0	10	0	7	0	9	1	26	1	yes	NA	NA	NA	No	6	6	NA	0	635	4	158.75	SMV-right
28	68	1	180	54	16.6667	2	Ascending colon	Above ICV	＞5	≤35	Laparoscopy	173	30	None	T2N0M0	6	0	6	0	5	0	17	0	no	NA	NA	NA	No	7	8	NA	0	620	4	155	SMV-right
29	43	0	158	69	27.6398	2	Ascending colon	Below ICV	≤5	≤35	Laparoscopy	177	50	None	T4N0M0	13	0	6	0	4	0	23	0	no	NA	NA	NA	No	4	19	NA	0	260	4	65	SMV-right
30	34	1	175	60	19.5918	1	Ascending colon	Above ICV	≤5	＞35	Laparoscopy	313	50	None	T4N2M0	20	5	16	2	23	0	59	7	no	NA	NA	NA	No	6	13	NA	0	180	2	90	SMV-right
31	64	0	158	55	22.0317	3	Ascending colon	Above ICV	＞5	≤35	Laparoscopy	183	200	None	T4N1M0	2	0	5	0	10	2	17	2	yes	NA	NA	NA	No	4	6	NA	0	140	3	46.6667	SMV-right
32	42	0	155	56.5	23.5172	1	Cecum	Below ICV	≤5	≤35	Laparoscopy	158	30	None	T4N0M0	7	0	5	0	14	0	26	0	no	NA	NA	NA	No	4	6	NA	0	100	1	100	SMV-right
33	46	0	145	39	18.5493	1	Cecum	Below ICV	≤5	≤35	Laparoscopy	236	50	None	T2N1M0	10	1	11	0	4	0	25	1	no	NA	NA	NA	No	3	7	NA	0	280	3	93.3333	SMV-right
34	49	0	154	48.5	20.4503	2	Hepatic flexure	Above ICV	≤5	≤35	Laparoscopy	245	20	None	T4N2M0	5	1	7	4	8	0	20	5	no	NA	NA	NA	No	3	7	NA	0	140	2	70	SMV-right
35	61	1	165	66	24.2424	2	Cecum	Below ICV	≤5	≤35	Open	127	50	None	T4N0M0	13	0	7	0	16	0	36	0	no	NA	NA	NA	Yes	5	9	NA	0	750	3	250	SMV-right
36	63	0	158	46	18.4265	2	Ascending colon	Above ICV	＞5	≤35	Laparoscopy	142	50	None	T1N0M0	13	0	6	0	18	0	37	0	no	NA	NA	NA	No	2	4	NA	0	150	2	75	SMV-right
37	51	0	151	45	19.736	2	Hepatic flexure	Above ICV	＞5	＞35	Laparoscopy	167	100	None	T4N0M0	7	0	4	0	8	0	19	0	no	NA	NA	NA	No	2	6	NA	0	110	1	110	SMV-right
38	67	1	165	58	21.3039	2	Hepatic flexure	Above ICV	＞5	＞35	Laparoscopy	207	150	None	T4N2M0	7	3	15	1	14	2	36	6	no	NA	NA	NA	No	2	8	NA	0	160	1	160	SMV-right
39	50	0	166	57	20.6852	2	Ascending colon	Below ICV	≤5	≤35	Laparoscopy	203	30	None	T4N0M0	4	0	7	0	4	0	15	0	no	NA	NA	NA	No	4	8	NA	1	280	3	93.3333	SMV-right
40	62	1	164	60	22.3081	2	Ascending colon	Below ICV	＞5	≤35	Laparoscopy	185	50	None	T4N0M0	7	0	11	0	29	0	47	0	no	NA	NA	NA	No	5	7	NA	1	1350	5	270	SMV-right
41	68	1	163	57	21.4536	2	Ascending colon	Above ICV	≤5	≤35	Open	161	200	None	T4N1M0	11	1	10	0	12	0	33	1	no	NA	NA	NA	No	3	10	NA	0	220	3	73.3333	SMV-right
42	47	1	168	75.5	26.7503	2	Ascending colon	Above ICV	＞5	＞35	Laparoscopy	216	30	None	T4N1M0	2	0	6	1	6	0	14	1	no	NA	NA	NA	No	3	5	NA	0	100	1	100	SMV-right
43	64	1	174	99	32.6992	3	Ascending colon	Below ICV	≤5	≤35	Laparoscopy	298	30	None	T2N1M0	22	1	6	0	9	0	37	1	no	NA	NA	NA	No	5	8	NA	0	300	4	75	SMV-right
44	37	1	168	63	22.3214	1	Hepatic flexure	Above ICV	≤5	≤35	Laparoscopy	170	20	None	T2N0M0	15	0	9	0	4	0	28	0	no	NA	NA	NA	No	2	4	NA	0	0	0	0	SMV-right
45	70	0	156	52	21.3675	2	Ascending colon	Above ICV	≤5	≤35	Laparoscopy	209	100	None	T4N2M0	12	9	6	1	3	1	21	11	no	NA	NA	NA	No	4	7	NA	0	460	3	153.333	SMV-right
46	49	1	175	53	17.3061	2	Cecum	Below ICV	＞5	≤35	Laparoscopy	141	20	None	T4N0M0	10	0	4	0	8	0	22	0	no	NA	NA	NA	No	2	8	NA	0	390	3	130	SMV-right
47	84	0	138	40	21.004	2	Ascending colon	Above ICV	＞5	＞35	Laparoscopy	215	30	None	T4N0M0	6	0	10	0	2	0	18	0	no	NA	NA	NA	No	5	17	NA	1	430	4	107.5	SMV-right
48	68	0	156	64	26.2985	2	Hepatic flexure	Above ICV	≤5	≤35	Laparoscopy	236	50	None	T4N2M0	10	4	6	0	8	0	24	4	no	NA	NA	NA	No	7	9	NA	0	280	3	93.3333	SMV-right
49	55	0	150	50	22.2222	3	Ascending colon	Above ICV	＞5	≤35	Laparoscopy	253	30	None	T4N2M0	12	2	9	3	10	0	31	5	no	NA	NA	NA	No	4	4	NA	0	0	0	0	SMV-right
50	69	1	180	80	24.6914	3	Ascending colon	Below ICV	＞5	＞35	Laparoscopy	229	30	None	T4N1M0	18	1	12	0	4	0	34	1	no	NA	NA	NA	No	6	8	NA	0	260	1	260	SMV-right
51	71	1	162	58	22.1003	1	Ascending colon	Above ICV	≤5	≤35	Open	197	50	Abdominal infection	T4N2M0	19	6	9	5	11	1	39	12	no	NA	NA	NA	No	3	14	NA	0	260	2	130	SMV-right
52	56	0	158	55	22.0317	1	Transverse colon	Above ICV	＞5	≤35	Laparoscopy	145	15	None	T2N0M0	5	0	7	0			12	0	no	NA	NA	NA	No	3	8	NA	0	320	6	53.3333	SMV-right
53	75	1	160	57.5	22.4609	2	Hepatic flexure	Above ICV	≤5	≤35	Laparoscopy	186	100	None	T4N0M0	16	0	6	0	8	0	30	0	no	NA	NA	NA	No	5	5	NA	0	630	3	210	SMV-right
54	86	0	150	60	26.6667	3	Cecum	Below ICV	≤5	≤35	Laparoscopy	180	50	None	T4N0M0	5	0	5	0	6	0	16	0	no	NA	NA	NA	No	4	21	NA	1	890	4	222.5	SMV-right
55	70	0	160	60	23.4375	3	Transverse colon	Above ICV	≤5	≤35	Laparoscopy	267	50	None	T2N0M0	10	0	2	0	15	0	27	0	no	NA	NA	NA	No	3	8	NA	0	200	4	50	SMV-right
56	72	0	154	49	20.6612	2	Transverse colon	Above ICV	≤5	≤35	Laparoscopy	229	50	None	T2N0M0	6	0	8	0	9	0	23	0	no	NA	NA	NA	Yes	3	9	NA	0	680	4	170	SMV-right
57	61	1	161	55	21.2183	2	Transverse colon	Above ICV	≤5	≤35	Laparoscopy	200	50	None	T4N0M0	7	0	18	0	8	0	33	0	no	NA	NA	NA	No	3	10	NA	1	860	5	172	SMV-right
58	63	0	158	55	22.0317	2	Ascending colon	Above ICV	＞5	＞35	Laparoscopy	217	100	None	T4N1M0	15	0	14	1	10	0	39	1	no	NA	NA	NA	No	3	5	NA	0	50	1	50	SMV-right
59	43	1	183	90	26.8745	1	Cecum	Below ICV	＞5	≤35	Laparoscopy	285	100	None	T4N0M0	5	0	7	0	6	0	18	0	no	NA	NA	NA	No	3	6	NA	0	280	2	140	SMV-right
60	74	0	150	52	23.1111	2	Hepatic flexure	Above ICV	＞5	＞35	Laparoscopy	305	150	None	T4N0M0	16	0	19	0	18	0	53	0	no	NA	NA	NA	No	3	8	NA	0	270	1	270	SMV-right
61	74	1	168	62	21.9671	2	Ascending colon	Below ICV	≤5	≤35	Laparoscopy	245	50	None	T4N0M0	7	0	6	0	7	0	20	0	no	NA	NA	NA	No	2	7	NA	1	240	3	80	SMV-right
62	41	1	184	90	26.5832	2	Ascending colon	Above ICV	≤5	≤35	Laparoscopy	214	20	None	T4N1M0	8	2	4	0	4	0	16	2	no	NA	NA	NA	No	3	8	NA	0	360	4	90	SMV-right
63	49	0	150	52	23.1111	2	Hepatic flexure	Above ICV	≤5	≤35	Laparoscopy	202	20	None	T2N1M0	15	1	5	0	19	0	39	1	no	NA	NA	NA	No	3	11	NA	1	190	2	95	SMV-right
64	71	0	156	59	24.2439	4	Ascending colon	Above ICV	≤5	＞35	Laparoscopy	373	100	Poor wound healing	T4N1M0	9	0	3	0	8	1	20	1	yes	NA	NA	NA	No	6	19	NA	0	740	6	123.333	SMV-right
65	85	1	171	70	23.939	3	Ascending colon	Below ICV	≤5	≤35	Laparoscopy	230	100	None	T4N0M0	5	0	1	0	2	0	8	0	no	NA	NA	NA	No	3	7	NA	0	300	6	50	SMV-right
66	75	0	157	41	16.6335	2	Transverse colon	Above ICV	≤5	≤35	Laparoscopy	193	20	None	T4N2M0	6	0	10	6	4	0	20	6	no	NA	NA	NA	No	2	6	NA	1	495	3	165	SMV-right
67	72	0	152	56.5	24.4546	3	Ascending colon	Above ICV	≤5	≤35	Laparoscopy	250	50	None	TisN0M0	6	0	6	0	8	0	20	0	no	NA	NA	NA	No	3	11	NA	0	610	3	203.333	SMV-right
68	75	1	167	72	25.8166	3	Hepatic flexure	Above ICV	≤5	≤35	Laparoscopy	233	20	None	T4N1M0	7	2	5	0	9	0	21	2	no	NA	NA	NA	No	4	9	NA	0	1200	6	200	SMV-right
69	68	1	170	66	22.8374	2	Hepatic flexure	Above ICV	≤5	≤35	Laparoscopy	221	100	None	T2N0M0	1	0	6	0	8	0	15	0	no	NA	NA	NA	No	2	5	NA	1	250	2	125	SMV-right
70	75	1	172	58	19.6052	2	Cecum	Below ICV	≤5	≤35	Laparoscopy	179	50	None	T1N0M0	1	0	5	0	5	0	11	0	no	NA	NA	NA	No	5	6	NA	0	460	4	115	SMV-right
71	61	1	168	66	23.3844	2	Transverse colon	Above ICV	≤5	≤35	Laparoscopy	330	100	None	T4N0M0	5	0	1	0	1	0	7	0	no	NA	NA	NA	Yes	5	9	NA	0	610	9	67.7778	SMV-right
72	68	1	180	63	19.4444	3	Ascending colon	Below ICV	≤5	≤35	Laparoscopy	267	50	None	T4N0M0	15	0	9	0	12	0	36	0	no	NA	NA	NA	No	4	6	NA	0	90	1	90	SMV-right
73	67	0	155	63	26.2227	3	Ascending colon	Below ICV	≤5	≤35	Laparoscopy	325	200	Chylous fistula	T2N0M0	3	0	2	0	4	0	9	0	no	NA	NA	NA	No	4	65	NA	0	0	0	0	SMV-right
74	53	1	173	71	23.7228	3	Hepatic flexure	Above ICV	≤5	≤35	Laparoscopy	242	50	None	T4N0M0	8	0	7	0	8	0	23	0	no	NA	NA	NA	No	3	8	NA	0	200	2	100	SMV-right
75	63	1	175	60	19.5918	2	Hepatic flexure	Above ICV	≤5	≤35	Laparoscopy	255	50	None	T4N0M0	15	0	7	0	22	0	44	0	no	NA	NA	NA	Yes	2	9	NA	0	1830	8	228.75	SMV-right
76	68	1	160	54	21.0938	2	Hepatic flexure	Above ICV	≤5	≤35	Laparoscopy	198	50	None	T4N0M0	11	0	5	0	3	0	19	0	no	NA	NA	NA	No	3	10	NA	0	120	3	40	SMV-right
77	50	1	179	68	21.2228	3	Ascending colon	Below ICV	≤5	≤35	Laparoscopy	203	20	None	T2N0M0	29	0	23	0	13	0	65	0	no	NA	NA	NA	No	2	8	NA	0	270	3	90	SMV-right
78	73	1	164	57	21.1927	2	Transverse colon	Above ICV	≤5	≤35	Laparoscopy	212	100	None	T4N0M0	7	0	2	0	10	0	19	0	no	NA	NA	NA	Yes	4	10	NA	0	530	4	132.5	SMV-right
79	67	0	155	45.5	18.9386	1	Hepatic flexure	Above ICV	≤5	≤35	Laparoscopy	180	50	None	T4N0M0	24	0	14	0	17	0	55	0	no	NA	NA	NA	No	5	8	NA	0	10	2	5	SMV-right
80	35	1	173	71	23.7228	1	Cecum	Below ICV	≤5	≤35	Open	240	100	None	T4N2M0	22	4	2	0	3	0	27	4	no	NA	NA	NA	No	3	8	NA	0	460	6	76.6667	SMV-right
81	63	0	157	37	15.0108	2	Cecum	Below ICV	≤5	≤35	Laparoscopy	255	100	None	T4N0M0	5	0	5	0	5	0	15	0	no	NA	NA	NA	No	5	11	NA	1	1580	8	197.5	SMV-right
82	71	1	170	72	24.9135	2	Transverse colon	Above ICV	＞5	≤35	Open	335	100	None	T4N0M0	7	0	3	0	5	0	15	0	no	NA	NA	NA	No	4	8	NA	0	1795	6	299.167	SMV-right
83	24	1	173	58.5	19.5463	2	Cecum	Below ICV	≤5	≤35	Open	165	50	None	T4N1M0	25	1	7	0	21	0	53	1	no	NA	NA	NA	Yes	3	8	NA	0	755	3	251.667	SMV-right
84	34	0	160	48.5	18.9453	1	Ascending colon	Above ICV	＞5	≤35	Laparoscopy	260	20	None	T4N2M0	4	0	2	0	6	6	12	6	yes	NA	NA	NA	Yes	4	7	NA	0	640	4	160	SMV-right
85	66	0	151	50	21.9289	1	Cecum	Below ICV	＞5	＞35	Laparoscopy	274	150	None	T3N1M0	10	1	13	0	33	0	56	1	no	11	0	4	Yes	9	9	14	0	445	3	148.333	SMV-left
86	47	0	162	74	28.1969	2	Hepatic flexure	Above ICV	≤5	≤35	Laparoscopy	273	50	None	T3N0M0	11	0	9	0	33	0	53	0	no	20	0	2.4	No	3	6	10	1	530	4	132.5	SMV-left
87	67	1	174	68.5	22.6252	3	Hepatic flexure	Above ICV	＞5	＞35	Laparoscopy	276	50	None	T3N1M0	10	2	10	0	19	0	39	2	no	14	0	5	No	4	6	14	0	1190	5	238	SMV-left
88	54	0	158	53.5	21.4309	2	Cecum	Below ICV	≤5	＞35	Laparoscopy	200	50	None	T2N2M0	8	4	9	4	14	0	31	8	no	6	0	4	No	3	7	13	0	100	2	50	SMV-left
89	55	1	167	59	21.1553	2	Ascending colon	Below ICV	≤5	≤35	Laparoscopy	202	20	None	TisN0M0	7	0	7	0	14	0	28	0	no	4	0	4.8	No	5	8	22	0	470	5	94	SMV-left
90	54	0	155	50	20.8117	2	Ascending colon	Above ICV	≤5	≤35	Laparoscopy	200	50	None	T4N0M0	10	0	3	0	13	0	26	0	no	2	0	3.5	No	4	9	17	1	880	5	176	SMV-left
91	72	0	155	41	17.0656	3	Cecum	Below ICV	＞5	≤35	Laparoscopy	250	100	Chylous fistula	T3N2M0	12	4	10	0	15	0	37	4	no	9	0	4.5	No	3	35	12	0	2350	32	73.4375	SMV-left
92	69	0	175	70.4	22.9878	2	Ascending colon	Below ICV	≤5	≤35	Laparoscopy	196	50	None	T3N1M0	14	2	5	0	11	0	30	2	no	6	0	7	No	5	8	22	1	720	5	144	SMV-left
93	90	0	158	55.7	22.3121	2	Ascending colon	Above ICV	≤5	≤35	Laparoscopy	170	10	None	T3N0M0	8	0	5	0	14	0	27	0	no	2	0	6.8	No	4	9	14	0	780	6	130	SMV-left
94	66	1	170	63	21.7993	2	Ascending colon	Above ICV	＞5	≤35	Laparoscopy	228	50	None	T3N1M0	23	4	16	2	25	0	64	6	no	13	0	4	No	1	7	9	0	440	5	88	SMV-left
95	64	0	160	55	21.4844	2	Ascending colon	Above ICV	≤5	≤35	Laparoscopy	268	5	None	T4N1M0	9	1	7	0	28	0	44	1	no	6	0	5	No	4	5	10	0	370	4	92.5	SMV-left
96	59	0	158	51	20.4294	2	Ascending colon	Above ICV	≤5	≤35	Laparoscopy	195	50	None	T4N2M0	10	3	3	2	7	0	20	5	no	4	1	6	No	5	7	10	0	410	3	136.667	SMV-left
97	57	0	152	47	20.3428	2	Ascending colon	Below ICV	≤5	≤35	Laparoscopy	165	50	None	T4N0M0	22	0	12	0	17	0	51	0	no	9	0	3.5	No	4	5	12	0	205	3	68.3333	SMV-left
98	57	0	153	38.5	16.4467	2	Cecum	Below ICV	≤5	≤35	Laparoscopy	238	100	None	T4N2M0	36	6	12	0	14	0	62	6	no	2	0	3	No	2	8	19	0	190	4	47.5	SMV-left
99	61	0	165	49.6	18.2185	2	Ascending colon	Below ICV	＞5	＞35	Laparoscopy	160	10	None	T4N0M0	12	0	8	0	22	0	42	0	no	6	0	3.5	No	4	7	17	0	445	4	111.25	SMV-left
100	72	0	153	46	19.6506	2	Ascending colon	Above ICV	≤5	≤35	Laparoscopy	220	100	None	T2N0M0	8	0	16	0	9	0	33	0	no	1	0	9.5	No	7	9	12	0	845	5	169	SMV-left
101	84	0	142	52	25.7885	2	Cecum	Below ICV	＞5	≤35	Laparoscopy	148	100	None	T4N0M0	7	0	7	0	30	0	44	0	no	8	0	6	No	3	7	21	0	620	5	124	SMV-left
102	53	0	150	54.5	24.2222	2	Ascending colon	Below ICV	≤5	≤35	Laparoscopy	200	10	None	T4N1M0	7	1	9	0	18	0	34	1	no	0	0	5.5	Yes	7	8	12	0	255	4	63.75	SMV-left
103	58	1	170	80	27.6817	2	Ascending colon	Above ICV	＞5	＞35	Laparoscopy	325	200	None	T3N2M0	4	0	12	0	17	11	33	11	yes	4	0	3.5	No	4	7	14	0	150	6	25	SMV-left
104	42	1	172	75	25.3515	2	Transverse colon	Above ICV	＞5	≤35	Laparoscopy	215	20	Abdominal infection	TisN0M0	9	0	5	0	4	0	18	0	no	2	0	5.2	No	4	15	13	0	530	9	58.8889	SMV-left
105	69	1	165	57	20.9366	2	Ascending colon	Below ICV	≤5	≤35	Laparoscopy	135	200	None	T2N0M0	12	0	2	0	13	0	27	0	no	5	0	6	No	7	7	12	0	495	5	99	SMV-left
106	82	1	165	73	26.8136	3	Ascending colon	Above ICV	＞5	＞35	Laparoscopy	240	30	None	T3N1M0	5	1	4	1	12	0	21	2	no	1	0	5	Yes	5	8	14	0	960	6	160	SMV-left
107	60	0	160	70	27.3438	2	Ascending colon	Below ICV	≤5	≤35	Laparoscopy	195	20	Poor wound healing	T3N1M0	16	0	15	1	16	0	47	1	no	0	0	3.5	No	3	22	11	0	240	2	120	SMV-left
108	47	1	157	65	26.3702	2	Ascending colon	Below ICV	≤5	≤35	Laparoscopy	283	100	None	T3N0M0	10	0	3	0	10	0	23	0	no	6	0	3	No	5	7	12	0	960	6	160	SMV-left
109	66	1	169	75	26.2596	2	Ascending colon	Above ICV	＞5	≤35	Laparoscopy	205	50	Chylous fistula	T3N0M0	9	0	13	0	5	0	27	0	no	4	0	5	No	6	9	12	0	1670	7	238.571	SMV-left
110	84	0	152	55	23.8054	3	Ascending colon	Below ICV	＞5	＞35	Laparoscopy	305	50	Ileus	T3N0M0	0	0	1	0	7	0	8	0	no	2	0	4	No	4	21	7	1	850	9	94.4444	SMV-left
111	69	1	160	50	19.5312	2	Ascending colon	Below ICV	≤5	≤35	Laparoscopy	235	50	Poor wound healing	T3N0M0	12	0	15	0	16	0	43	0	no	3	0	8.5	No	4	26	19	0	325	4	81.25	SMV-left
112	73	1	167	68	24.3824	2	Ascending colon	Above ICV	＞5	≤35	Laparoscopy	200	50	None	T3N1MO	17	0	13	0	7	2	37	2	yes	5	0	6	No	4	6	3	0	170	5	34	SMV-left
113	56	1	165	65	23.8751	3	Ascending colon	Below ICV	≤5	≤35	Laparoscopy	200	200	None	T3N1M0	22	2	13	0	15	0	50	2	no	0	0	4.5	No	3	8	13	0	1010	6	168.333	SMV-left
114	66	1	168	68.5	24.2701	2	Transverse colon	Above ICV	≤5	＞35	Laparoscopy	305	50	None	T2N0M0	5	0	6	0	8	0	19	0	no	5	0	4	No	3	6	13	1	500	3	166.667	SMV-left
115	73	1	170	74	25.6055	2	Ascending colon	Below ICV	≤5	≤35	Laparoscopy	198	30	Poor wound healing	T1N0M0	5	0	17	0	6	0	28	0	no	0	0	7	No	6	6	12	0	480	5	96	SMV-left
116	65	1	160	71	27.7344	1	Ascending colon	Below ICV	≤5	≤35	Laparoscopy	283	20	None	T2N0M0	7	0	7	0	12	0	26	0	no	2	0	6	No	3	7	11	0	770	5	154	SMV-left
117	76	1	169	65	22.7583	3	Transverse colon	Above ICV	≤5	≤35	Laparoscopy	153	30	None	T3N0M0	11	0	10	0	11	0	32	0	no	4	0	4	No	2	7	15	0	150	4	37.5	SMV-left
118	83	0	150	45.8	20.3556	3	Ascending colon	Above ICV	≤5	≤35	Laparoscopy	260	20	None	T3N2M0	7	3	5	0	17	5	29	8	yes	9	0	7	No	3	11	6	0	1780	6	296.667	SMV-left
119	57	0	153	52.5	22.4273	2	Ascending colon	Above ICV	＞5	≤35	Laparoscopy	360	50	Abdominal infection	T3N1M0	5	0	10	1	9	0	24	1	no	0	0	4	No	4	9	13	1	495	4	123.75	SMV-left
120	79	0	152	55.6	24.0651	2	Ascending colon	Above ICV	≤5	≤35	Laparoscopy	165	30	None	T2N1M0	1	0	4	0	6	1	11	1	yes	1	0	5	No	6	7	11	0	245	5	49	SMV-left
121	74	1	152	44	19.0443	2	Cecum	Below ICV	≤5	≤35	Laparoscopy	277	50	None	T3N1M0	5	0	7	1	18	0	30	1	no	7	0	4	No	1	9	20	0	1280	5	256	SMV-left
122	51	0	150	52	23.1111	2	Ascending colon	Below ICV	≤5	≤35	Laparoscopy	196	50	None	T4N2M0	11	7	5	0	2	0	18	7	no	0	0	5	No	5	10	19	0	910	7	130	SMV-left
123	34	1	168	59	20.9042	1	Ascending colon	Below ICV	≤5	≤35	Laparoscopy	150	50	None	T2N0M0	7	0	5	0	8	0	20	0	no	2	0	7	No	2	7	10	0	155	4	38.75	SMV-left
124	65	0	152	46	19.91	2	Ascending colon	Below ICV	≤5	≤35	Laparoscopy	195	50	None	TisN0M0	11	0	4	0	10	0	25	0	no	0	0	3.5	No	2	7	4	0	440	4	110	SMV-left
125	57	0	158	46	18.4265	3	Ascending colon	Below ICV	≤5	≤35	Laparoscopy	225	20	None	T4N2M0	6	0	8	0	18	0	32	0	no	5	0	4.5	No	6	6	7	0	275	5	55	SMV-left
126	44	1	172	70	23.6614	2	Ascending colon	Above ICV	＞5	≤35	Laparoscopy	365	100	None	T3N1M0	7	0	5	1	21	0	33	1	no	0	0	6	Yes	2	13	14	0	1285	8	160.625	SMV-left
127	28	0	161	59	22.7615	1	Ascending colon	Below ICV	≤5	＞35	Laparoscopy	262	50	None	T3N0M0	5	0	10	0	24	0	39	0	no	0	0	4.5	Yes	3	8	8	0	340	5	68	SMV-left
128	43	1	163	58	21.83	2	Ascending colon	Below ICV	≤5	≤35	Laparoscopy	262	20	None	T4N1M0	27	1	7	0	28	0	62	1	no	7	0	8	No	2	8	9	0	1010	7	144.286	SMV-left
129	68	1	153	49	20.9321	2	Ascending colon	Below ICV	≤5	≤35	Laparoscopy	225	20	None	T4N1M0	14	2	7	0	9	0	30	2	no	3	0	4	No	2	6	17	0	1015	5	203	SMV-left
130	36	1	165	75	27.5482	1	Ascending colon	Below ICV	≤5	≤35	Laparoscopy	200	50	None	T4N1M0	9	0	15	0	8	0	32	0	no	0	0	5	No	3	7	10	0	195	2	97.5	SMV-left
131	59	1	170	57.3	19.827	2	Ascending colon	Below ICV	＞5	≤35	Laparoscopy	329	50	None	T3N1M0	30	1	15	0	16	0	61	1	no	3	0	3	No	6	10	19	1	1895	10	189.5	SMV-left
132	59	0	158	53	21.2306	2	Ascending colon	Below ICV	＞5	≤35	Laparoscopy	245	20	None	T3N0M0	4	0	4	0	12	0	20	0	no	0	0	5	No	3	6	14	0	520	3	173.333	SMV-left
133	74	0	145	38	18.0737	3	Ascending colon	Below ICV	≤5	≤35	Laparoscopy	245	20	None	T3N0M0	6	0	3	0	16	0	25	0	no	9	0	6	No	3	5	4	0	635	5	127	SMV-left
134	84	1	173	57	19.0451	2	Hepatic flexure	Above ICV	≤5	≤35	Laparoscopy	227	20	None	TisN0M0	6	0	2	0	13	0	21	0	no	3	0	9	No	4	9	9	0	335	6	55.8333	SMV-left
135	72	0	158	64.5	25.8372	2	Ascending colon	Below ICV	≤5	≤35	Laparoscopy	215	20	Abdominal infection	T2N0M0	4	0	4	0	9	0	17	0	no	5	0	3.2	No	7	7	11	0	1500	6	250	SMV-left
136	34	1	181	72	21.9774	1	Ascending colon	Below ICV	＞5	＞35	Open	252	200	None	T3N2M0	10	6	13	7	38	0	61	13	no	0	0	4.5	Yes	6	12	7	0	825	6	137.5	SMV-left
137	64	1	172	60.6	20.484	2	Hepatic flexure	Above ICV	＞5	≤35	Laparoscopy	161	50	Abdominal infection	T2N0M0	14	0	8	0	11	0	33	0	no	0	0	4	No	4	11	13	0	1900	8	237.5	SMV-left
138	73	0	150	41	18.2222	3	Cecum	Below ICV	＞5	≤35	Laparoscopy	240	100	None	T3N1M0	13	2	16	0	30	0	59	2	no	0	0	4	Yes	3	8	9	0	410	7	58.5714	SMV-left
139	87	0	155	70	29.1363	3	Ascending colon	Above ICV	≤5	≤35	Laparoscopy	265	200	None	T3N0M0	1	0	2	0	5	0	8	0	no	3	0	4	No	5	8	10	0	990	7	141.429	SMV-left
140	75	0	155	28	11.6545	3	Transverse colon	Above ICV	＞5	≤35	Open	165	50	None	T3N0M0	16	0	14	0	19	0	49	0	no	2	0	4	Yes	8	13	12	0	920	6	153.333	SMV-left
141	71	0	158	53	21.2306	2	Ascending colon	Above ICV	≤5	≤35	Laparoscopy	175	50	None	T3N1M0	14	0	13	3	22	0	49	3	no	10	0	4	No	1	7	15	0	400	4	100	SMV-left
142	72	0	155	50	20.8117	1	Ascending colon	Below ICV	≤5	＞35	Laparoscopy	144	50	None	T3N1M0	13	1	13	0	9	0	35	1	no	0	0	2.5	No	6	6	11	0	210	5	42	SMV-left
143	46	0	152	41	17.7458	2	Hepatic flexure	Above ICV	≤5	≤35	Laparoscopy	190	50	None	T3N0M0	25	0	6	0	16	0	47	0	no	1	0	7	Yes	3	7	8	0	415	4	103.75	SMV-left
144	61	1	168	57	20.1956	2	Transverse colon	Above ICV	＞5	≤35	Laparoscopy	175	20	None	T4N0M0	17	0	8	0	15	0	40	0	no	5	0	5	No	4	5	11	0	410	4	102.5	SMV-left
145	47	0	150	40	17.7778	2	Ascending colon	Below ICV	≤5	≤35	Laparoscopy	230	20	None	T3N0M0	27	0	9	0	28	0	64	0	no	16	0	3	No	1	6	18	0	335	5	67	SMV-left
146	58	1	170	50	17.301	2	Transverse colon	Above ICV	≤5	≤35	Laparoscopy	240	20	Abdominal bleeding	T3N0M0	21	0	14	0	13	0	48	0	no	1	0	4.5	No	8	9	10	0	2440	7	348.571	SMV-left
147	44	1	168	56	19.8413	1	Transverse colon	Above ICV	≤5	＞35	Laparoscopy	250	20	None	T3N1M0	6	1	2	0	25	2	33	3	yes	3	0	4.5	No	2	6	7	0	170	2	85	SMV-left
148	84	1	165	43.5	15.978	3	Hepatic flexure	Above ICV	＞5	＞35	Laparoscopy	250	20	Abdominal infection	T3N1M0	15	1	8	0	17	0	40	1	no	4	0	3.5	Yes	4	8	5	0	2550	5	510	SMV-left
149	46	1	170	56	19.3772	1	Ascending colon	Below ICV	≤5	≤35	Laparoscopy	180	20	None	T3N1M0	13	2	13	0	14	0	40	2	no	4	0	5.5	No	2	3	12	0				SMV-left
150	73	1	162	65	24.7676	3	Hepatic flexure	Above ICV	≤5	≤35	Laparoscopy	240	200	None	T2N0M0	11	0	1	0	13	0	25	0	no	0	0	3	No	5	6	20	0	215	3	71.6667	SMV-left
151	58	0	150	54	24	3	Cecum	Below ICV	＞5	＞35	Laparoscopy	189	50	None	T4N2M0	4	1	10	2	23	2	37	5	no	7	0	3.5	No	1	4	10	0	910	5	182	SMV-left
152	65	1	176	58	18.7242	2	Ascending colon	Below ICV	≤5	≤35	Laparoscopy	260	50	None	T3N0MO	7	0	6	0	36	0	49	0	no	14	0	5.5	No	6	7	10	0	480	4	120	SMV-left
153	69	1	178	77.5	24.4603	2	Ascending colon	Above ICV	≤5	≤35	Laparoscopy	145	20	None	T2N0M0	8	0	12	0	27	0	47	0	no	15	0	5	No	5	7	15	0	295	4	73.75	SMV-left
154	48	1	167.5	63	22.4549	2	Ascending colon	Below ICV	≤5	≤35	Laparoscopy	325	30	None	T3N0M0	12	0	4	0	13	0	29	0	no	10	0	6	No	3	7	7	0	420	4	105	SMV-left
155	61	1	170	56	19.3772	2	Ascending colon	Below ICV	≤5	≤35	Laparoscopy	180	50	None	T3N0M0	25	0	16	0	38	0	79	0	no	15	0	8	No	5	5	13	0	700	4	175	SMV-left
156	79	1	167	60	21.5139	2	Hepatic flexure	Above ICV	≤5	≤35	Laparoscopy	185	100	None	T3N0M0	11	0	4	0	9	0	24	0	no	3	0	4.5	No	6	6	15	0	695	5	139	SMV-left
157	64	1	165	71	26.079	2	Hepatic flexure	Above ICV	＞5	≤35	Laparoscopy	181	50	None	T1N0M0	5	0	3	0	9	0	17	0	no	0	0	5.5	No	4	8	9	0	325	4	81.25	SMV-left
158	74	1	160	50	19.5312	2	Ascending colon	Below ICV	≤5	≤35	Laparoscopy	180	20	None	T3N0M0	16	0	7	0	18	0	41	0	no	4	0	4.5	No	5	5	10	0	420	3	140	SMV-left
159	65	1	170	61	21.1073	2	Hepatic flexure	Above ICV	≤5	≤35	Laparoscopy	126	20	None	T2N0M0	8	0	7	0	7	0	22	0	no	1	0	4	No	4	7	12	0	150	3	50	SMV-left
160	54	0	150	40.55	18.0222	3	Cecum	Below ICV	≤5	≤35	Laparoscopy	205	10	None	T2N0M0	22	0	15	0	23	0	60	0	no	2	0	3.5	No	2	6	7	1	700	5	140	SMV-left
161	64	1	161	65	25.0762	2	Hepatic flexure	Above ICV	≤5	≤35	Laparoscopy	320	100	None	T3N2M0	10	7	9	4	16	7	35	18	no	8	2	2.6	No	7	9	9	0	220	5	44	SMV-left
162	62	1	164	60	22.3081	3	Hepatic flexure	Above ICV	≤5	≤35	Laparoscopy	306	150	None	T3N1M0	10	2	6	1	12	0	28	3	no	4	0	5	No	8	13	14	0	865	7	123.571	SMV-left
